# Supplementary material for: The innate capacity of proteins to protect against reactive radical species
Source: Royal Society of Chemistry journal article supplement (doi:10.1039/c5an00798d), 2015-01-01
Supplement: c5an00798d1.pdf [file c5an00798d1.pdf]

Supporting Information

The Innate Capacity of Proteins to Protect Against  
Reactive Species

*Omar Hamdy and Ryan R. Julian†*

Department of Chemistry, University of California, Riverside, California, 92521

† **Corresponding author:** Ryan R. Julian, Department of Chemistry, University of California,  
Riverside, California, 92521

**Phone:** (951) 827-3958,

**Email:** [ryan.julian@ucr.edu](mailto:ryan.julian@ucr.edu)

Supporting information includes

**SI Table 1** Peptides Identified with No Antioxidant Capacity

| Peptides not AOX  | Source |
|-------------------|--------|
| SEVAHR            | HSA    |
| NYEAK             | HSA    |
| TPVSDRVTK         | HSA    |
| LVTDLTK           | HSA    |
| LVNEVTEFAK        | HSA    |
| KQTALVE           | HSA    |
| EQLK              | HSA    |
| KYLYE             | HSA    |
| FQNALLVR          | HSA    |
| DAHKSE            | HSA    |
| AWAVAR            | HSA    |
| SLHTLFGDKLCTVATLR | HSA    |
| SLHTLFGDK         | HSA    |
| VSKLVTDLTK        | HSA    |
| AACLLPK           | HSA    |
| LDELRDEGK         | HSA    |
| CASLQK            | HSA    |
| KSLHTLFGD         | HSA    |
| TYETTLEK          | HSA    |
| SEVAHRFK          | HSA    |
| QEPERNE           | HSA    |
| AEFAEVSK          | HSA    |
| ADDKETCFAEEGK     | HSA    |
| HPDYSVLLLLR       | HSA    |
| RPCFSALEVDETYVPK  | HSA    |
| KVPQVSTPTLVEVSR   | HSA    |
| FAKTCVADE         | HSA    |
| DLGEENFK          | HSA    |
| AEFAEVSKLVTDLTK   | HSA    |
| TCVADESAENCDK     | HSA    |
| ETYGEMADCCAK      | HSA    |
| QEPERNECFLQHK     | HSA    |
| VSRNLGK           | HSA    |
| SISSKLLK          | HSA    |
| NYAEAKD           | HSA    |
| ETCFAEEGK         | HSA    |
| YKAAFTECCQAADK    | HSA    |
| AAFTECCQAADK      | HSA    |
| CCAAADPHECYAK     | HSA    |

|                          |                       |
|--------------------------|-----------------------|
| KPLLEK                   | HSA                   |
| CFLQHKD                  | HSA                   |
| LVRPEVDVMCTAFHDNEETFLK   | HSA                   |
| TCFAEEGKK                | HSA                   |
| AVMDDFAAFVEK             | HSA                   |
| TPVSDRVTKCCTE            | HSA                   |
| FQNALLVRYTK              | HSA                   |
| NECFLQHK                 | HSA                   |
| ICTLSEKE                 | HSA                   |
| VPQVSTPTLVE              | HSA                   |
| VMCTAFHDNEE              | HSA                   |
| VHTECCHGDLLECADDR        | HSA                   |
| PLLEKSHCIAE              | HSA                   |
| CCQAADK                  | HSA                   |
| NDIAAKYKELGFQG           | Myo horse             |
| HPGDFGADAQGAMTK          | Myo horse             |
| LFTGHPETLEK              | Myo horse             |
| IPIK                     | Myo horse             |
| VEADIAGHGQEVLR           | Myo horse             |
| HGTVVLTALGGILK           | Myo horse             |
| TEAEMK                   | Myo horse             |
| GHHEAELKPLAQSHATK        | Myo horse             |
| HKIPIK                   | Myo horse             |
| WENGEC(+57)AQK           | Beta Lact Bovine      |
| IIAEKTKIPAVFK            | Beta Lact Bovine      |
| IDALNENK                 | Beta Lact Bovine      |
| GLDIQK                   | Beta Lact Bovine      |
| VLVLDTDYK                | Beta Lact Bovine      |
| VLVLDTDYKK               | Beta Lact Bovine      |
| IPAVFK                   | Beta Lact Bovine      |
| SDRDK                    | $\alpha$ A-Crystallin |
| EFHRR                    | $\alpha$ A-Crystallin |
| VQEDFVEIHGKHNER          | $\alpha$ A-Crystallin |
| EFHR                     | $\alpha$ A-Crystallin |
| HNERQDDHGYISR            | $\alpha$ A-Crystallin |
| VQEDFVEIHGK              | $\alpha$ A-Crystallin |
| IPSGVDAGHSER             | $\alpha$ A-Crystallin |
| HFSPEDLTVKVVQEDFVEIHGK   | $\alpha$ A-Crystallin |
| TVLDSGISEVR              | $\alpha$ A-Crystallin |
| KQASGPER                 | $\alpha$ B-Crystallin |
| LEKDR                    | $\alpha$ B-Crystallin |
| EFHRK                    | $\alpha$ B-Crystallin |
| VLGDVIEVHGKHEERQDEHGFISR | $\alpha$ B-Crystallin |

|                              |                       |
|------------------------------|-----------------------|
| VLGDVIEVHGK                  | $\alpha$ B-Crystallin |
| DRFSVNLDVK                   | $\alpha$ B-Crystallin |
| KYRIPADCPLAITSSLSSDGVLTVNGPR | $\alpha$ B-Crystallin |
| APSWIDTGLSEMRLEK             | $\alpha$ B-Crystallin |

**SI Table 2** Percent of Antioxidant Peptides with Specified Residues

| <b>Residue</b> | <b>Presence in Antioxidants (%)</b> | <b>Presence in Not Antioxidants (%)</b> |
|----------------|-------------------------------------|-----------------------------------------|
| Leu            | 65                                  | 55                                      |
| Met            | 12                                  | 7                                       |
| Ser            | 41                                  | 30                                      |
| Thr            | 41                                  | 49                                      |
| Aromatic       | 71                                  | 78                                      |

\*Percentages are calculated based on presence of residue in peptide (multiple occurrences in one peptide was not taken into consideration)

**SI Table 3** Natural Abundances of Amino Acids vs Abundances in Not Antioxidant Peptides

| <b>Amino Acid</b> | <b>Natural Abundance in Proteins (%)</b> | <b>Abundance in Not Antioxidant Peptides (%)</b> | <b>Deviation from Natural Abundance</b> |
|-------------------|------------------------------------------|--------------------------------------------------|-----------------------------------------|
| Alanine           | 7.4                                      | 10.0                                             | 2.6                                     |
| Arginine          | 4.2                                      | 2.6                                              | -1.6                                    |
| Asparagine        | 4.4                                      | 2.5                                              | -1.9                                    |
| Aspartic Acid     | 5.9                                      | 6.5                                              | 0.6                                     |
| Cysteine          | 3.3                                      | 5.0                                              | 1.7                                     |
| Glutamic Acid     | 5.8                                      | 10.6                                             | 3.8                                     |

|               |     |      |      |
|---------------|-----|------|------|
| Glutamine     | 3.7 | 2.9  | -0.8 |
| Glycine       | 7.4 | 3.7  | -3.7 |
| Histidine     | 2.9 | 3.5  | 0.6  |
| Isoleucine    | 3.8 | 2.3  | -1.5 |
| Leucine       | 7.6 | 8.8  | 1.2  |
| Lysine        | 7.2 | 10.7 | 3.5  |
| Methionine    | 1.8 | 0.7  | -1.1 |
| Phenylalanine | 4.0 | 3.7  | -0.3 |
| Proline       | 5.0 | 3.1  | -1.9 |
| Serine        | 8.1 | 3.2  | -4.9 |
| Threonine     | 6.2 | 7.0  | 0.8  |
| Tryptophan    | 1.3 | 0.3  | -1.0 |
| Tyrosine      | 3.3 | 1.9  | -1.4 |
| Valine        | 6.8 | 6.9  | 0.1  |
